# Supplementary material for: Total Global Solar Radiation Estimation with Relative Humidity and Air Temperature Extremes in Ireland and Holland
Source: Copernicus journal article supplement (doi:10.5194/gi-2017-52), 2017-11-21
Supplement: Supplementary file [file gi-2017-52-AC2-supplement.pdf]

# Total Global Solar Radiation Estimation with Relative Humidity and Air Temperature Extremes in Ireland and Holland

Can Ekici,<sup>a, b</sup>, Ismail Teke <sup>a</sup>

<sup>a</sup>Yildiz Technical University, Department of Mechanical Engineering, Istanbul, Turkiye.

<sup>b</sup>Turkish Standard Institution, Gebze Calibration Laboratory, Kocaeli, Turkiye.

[canekici@gmail.com](mailto:canekici@gmail.com)

**Abstract.** Solar radiation is the earth's primary energy source for all biochemical and physical activities. Accurate knowledge of the solar radiation is important in engineering applications. This study aimed to calibrate some of the existing models in the literature for estimating daily total global solar radiation parameter using available measuring records (maximum and minimum air temperatures) and new models were developed based on maximum and minimum air temperatures, relative humidity and relative humidity extremes. Applicability of the Hargreaves model, Allen model, Bristow-Campbell model and Chen model were evaluated for computing the daily total solar global radiation, the geographical and meteorological data of Irish and Dutch cities were used. Meteorological data were taken from Royal Netherlands Meteorological Institute and Irish Meteorological Service. The models were compared on the basis of error tests which were mean percentage error (MPE), mean bias error (MBE), root mean square error (RMSE) and Nash-Sutcliffe equation (NSE). And, monthly MPE errors were given for each model. This study proposed new estimation models which were based on daily average relative humidity, relative humidity extremes and temperature extremes. Error analyses were applied to these models and results were given in the study.

**Keywords:** solar radiation; temperature; relative humidity; daily total global solar radiation; model comparison; Ireland; Holland; meteorological models; model validation

## 1 Introduction

Solar energy is the principal energy source for the processes such as biological, chemical and physical activities. Accurate knowledge of the solar radiation is important for many applications; simulations and modellings, architectural design, solar energy systems. There are many meteorological stations those measure basic meteorological parameters; but not all of them measure the global radiation in the worldwide. Sometimes, measurement of the solar radiation

30 cannot be available due to the equipment's cost, maintenance and calibration requirements in  
31 developing countries. There are several empirical models in the literature to estimate the global  
32 radiation using various parameters (Chen *et. al.*, 2004; Menges *et. al.*, 2006).

33 Solar energy is an energy source, which is clean, renewable and domestic and solar energy has  
34 high importance (Menges *et. al.*, 2006). Without knowledge of solar radiation, it is impossible to  
35 design solar energy systems. Estimation models are widely used when solar radiation is not  
36 measured and available, these models help to obtain solar radiation value.

37 Amount of the solar radiation that received to the globe can change due to variables such as the  
38 time of day and the season, and the prevailing atmospheric conditions... In the northern  
39 hemisphere, the greatest amount of radiation is received in the location that is situated between 15  
40 °N and 35 °N latitudes, for example Egypt. The next place which receive greatest amount of  
41 radiation is between 15 °N and the equator which includes Central America. Countries located  
42 between the latitudes 35 °N and 45 °N, such as Spain and Turkey, show significant seasonal  
43 variations resulting in less radiation received. The least favorable locations are situated beyond 45  
44 °N receive the least amount of direct radiation; such as Ireland, England, Norway, Holland and  
45 Sweden. Approximately half of the radiation arrives at the surface as diffuse radiation, because  
46 there may be frequent heavy cloud cover in the atmosphere (Armstorng *et. al.*, 2010).

47 One of the main purposes of this study is the validation of the several models in the literature;  
48 those use the difference between maximum, minimum air temperatures, to estimate daily total  
49 global radiation in the cities of Ireland and Netherlands. These cities are Dublin, Eindhoven,  
50 Groningen, Maastricht, Rotterdam and Twente. The study suggests new estimation models for the  
51 prediction of the solar radiation. In this study, meteorological data for the cities were taken from  
52 Royal Netherlands Meteorological Institute and Irish Meteorological Service database and used

53 for validation of the models. In the last years, calibration and metrology knowledge were  
54 developed; new methodologies were submitted by commissions like Euramet. So, it is thought the  
55 new data of meteorology institutes are more accurate and traceable. It has been thought that; the  
56 measurement's reliability is higher in the data which have been recorded in recent past.  
57 Meteorological parameters were taken between 2008 and first half of 2016.

## 58 **2 Some of the Main Mathematical Formulas about the Solar Radiation**

59 Mathematical formulas about solar radiation, which were used in this study, are given in this part  
60 of the paper.

61 The plane of rotation of the earth around the sun is called the ecliptic plane. The rotation axis of  
62 the earth is called polar axis. The earth's rotation and the position of the earth axis causes diurnal  
63 and seasonal changes in solar radiation. The angle between the sun and the equatorial plane of the  
64 earth is different in every day of the year. This angle is called the solar declination angle;  $\delta$  (Iqbal,  
65 1983).

66 The solar declination angle's mathematical formula can be seen in equation 1.  $J$  is the calendar  
67 day in this equation with  $J = 1$  on January 1 and  $J = 365$  (or 366 during leap years) on December  
68 31 (Campbell *et. al.*, 1998).

$$69 \sin\delta = 0.39785 * \sin[278.97 + 0,9856J + 1.9165 * \sin(356.6 + 0,9856J)] \quad (1)$$

70 Sunrise hour angle can be seen in equation 2. Here,  $\omega_s$  is the sunrise angle;  $\varnothing$  is the latitude of the  
71 site (Iqbal, 1983).

$$72 \omega_s = \cos^{-1}[-\tan\varnothing * \tan\delta] \quad (2)$$

73 Reciprocal of the square of the radius vector of the earth is called the eccentricity correction factor  
74 of the earth's orbit,  $E_0$ . In many engineering applications, this factor can be expressed very simple.  
75 The simple expression of the eccentricity factor can be seen in equation 3 (Iqbal, 1983).

$$76 \quad E_0 = 1 + 0.033 * \cos\left[\left(\frac{2\pi * J}{365}\right)\right] \quad (3)$$

77 Mathematical equations are developed to determine the irradiation at various surface orientations  
78 and for different time periods. Daily extraterrestrial radiation is shown in equation 4 (Iqbal, 1983).  
79  $I_{sc}$  is the solar constant and it is equal to 4.921 MJ/day.m<sup>2</sup> (Menges *et. al*, 2006).

$$80 \quad H_0 = \frac{24}{\pi} * I_{sc} * E_0 * \sin\theta * \sin\delta * \left[\left(\frac{\pi}{180}\right) * \omega_s - \tan\omega_s\right] \quad (4)$$

### 81 **3 Model Description**

#### 82 *3.1 Hargreaves Model*

83 Hargreaves et al. (1985) suggested a simple method to estimate global solar radiation; the  
84 expression can be seen in equation 5. “a” and “b” are the empirical coefficients. In this study,  
85 Hargreaves model was used to predict daily total global solar radiation in Irish and Dutch cities.  
86  $T_{max}$  can be taken as the daily maximum air temperature and  $T_{min}$  is the daily minimum air  
87 temperature.  $H$  is the daily total global solar radiation.

$$88 \quad \frac{H}{H_0} = a * (T_{max} - T_{min})^{0.5} + b \quad (5)$$

#### 89 *3.2 Allen Model*

90 Allen (1997) reported a self-calibrating model to estimate mean monthly global solar radiation,  
91 which is the function of the mean monthly maximum and minimum temperatures. The model can  
92 be seen in equation 6. In this study, this model was processed to estimate daily total global solar  
93 radiation in the cities of Ireland and Netherlands.

94 
$$\frac{H}{H_0} = a * (T_{\max} - T_{\min})^{0.5} \quad (6)$$

95 Also, “a” is an empirical coefficient, and it has been suggested as a mathematical expression, which  
96 is the function ratio of the atmospheric pressure at site (P, kPa) and at sea level (P<sub>0</sub>, 101.3 kPa) in  
97 literature. The mathematical expression can be seen in equation 7. *K<sub>ra</sub>* value can be taken 0.17 for  
98 interior regions, and 0.20 for coastal regions (Meza, 2000).

99 
$$a = K_{ra} * \left(\frac{P}{P_0}\right)^{0.5} \quad (7)$$

### 100 *3.3 Bristow-Campbell Model*

101 Bristow and Campbell (1984) suggested a relationship between daily solar radiation as a function  
102 of daily extraterrestrial radiation and the difference between maximum and minimum air  
103 temperatures. The relationship can be seen in equation 8 and “a”, “b” and “c” are the empirical  
104 coefficients.

105 
$$\frac{H}{H_0} = a * [1 - \exp(-b\Delta T^c)] \quad (8)$$

### 106 *3.4 Chen Model*

107 Chen et al. (2004) presented the model in equation 9.

108 
$$\frac{H}{H_0} = a * \ln(T_{\max} - T_{\min}) + b \quad (9)$$

### 109 *3.5 New Models Suggested in This Study*

110 Three models based on daily temperature extremes and daily average relative humidity are  
111 suggested in the study. The models are shown in Eq. 10 and Eq. 11. *RH* is the relative humidity,  
112 “a”, “b”, “c”, “d” and “e” are the empirical coefficients. The *H<sub>0</sub>* value is calculated using the daily  
113 parameters. The usage and explanations of these parameters are given in the previous sections.

114 Models will be used to calculate total daily global solar radiation values. In this study, the reason  
 115 why the period is selected on a daily basis is due to the importance of daily meteorological  
 116 estimations. It is also thought that there may be instantaneous changes in shorter time periods.

$$117 \quad \frac{H}{H_0} = a \left( \frac{RH}{100} \right) + b(T_{\max} - T_{\min})^{0.5} + c(T_{\max} - T_{\min}) + d \left( \frac{RH}{100} \right) (T_{\max} - T_{\min})^{0.5} + e \quad (10)$$

$$118 \quad \frac{H}{H_0} = a \cdot [1 - \exp(-\Delta T^b)] + c \cdot RH \quad (11)$$

119 Daily relative humidity extremes were used to estimate solar radiation in this study. Two models  
 120 were proposed for estimation the daily solar radiation related to relative humidity extremes. One  
 121 of the models use the saturation vapor pressure, the ratio between daily maximum relative humidity  
 122 and daily minimum relative humidity and the daily temperature extremes. Other model is based  
 123 on temperature extremes, relative humidity ratio and the relative humidity.  $RH_{\max}$  is the daily  
 124 measured maximum relative humidity,  $RH_{\min}$  is minimum relative humidity,  $e_s$  is the saturation  
 125 vapor pressure at daily average temperature. The models are given in Eq. 12 and Eq. 13.  
 126 Calculation of  $e_s$  is shown in Eq. 14.  $T_{\text{avg}}$  is daily average air temperature.

$$127 \quad \frac{H}{H_0} = a \cdot [1 - \exp(\{e_s \cdot (T_{\max} - T_{\min})^{0.5}\}^b)] + c \cdot \frac{RH_{\min}}{RH_{\max}} \quad (12)$$

$$128 \quad \frac{H}{H_0} = a \cdot [1 - \exp(\{T_{\max} - T_{\min}\}^{0.5b})] + c \cdot (T_{\max} - T_{\min})^{0.5} \cdot \frac{RH_{\min}}{RH_{\max}} + d \cdot (T_{\max} - T_{\min})^{0.5} \quad (13)$$

$$129 \quad e_s = 0.6108 \cdot \left[ \exp \left( \frac{17.27 \cdot T_{\text{avg}}}{T_{\text{avg}} + 237.3} \right) \right] \quad (14)$$

130 Empirical coefficients of the models for the cities and performance of the models can be seen in  
 131 the next sections of the study.

#### 132 **4 Climatic Data**

133 Daily climatic data for the Irish and Dutch cities were taken from meteorological public authorities  
 134 of Ireland and Netherlands; Royal Netherlands Meteorological Institute and Irish Meteorological

135 Service. Dublin, Eindhoven, Rotterdam, Groningen, Maastricht and Twente’s daily meteorological  
 136 data were used in the study. Locations and altitudes of the meteorological stations are given in  
 137 Table 1.

138 The meteorological dataset is selected on a daily basis. These meteorological data belong to the  
 139 period between 2008 and July 2016. Maximum and minimum temperatures, daily total global solar  
 140 radiation, average daily relative humidity, daily maximum and minimum relative humidity values,  
 141 daily average temperature values were taken from meteorological stations. Extraterrestrial solar  
 142 radiation values were obtained by calculation. With the help of this data obtained from  
 143 meteorological stations, the models in the literature have been calibrated and new models have  
 144 been developed.

145 **Table 1** Location and altitude information of the meteorological stations

| Station name | Latitude | Longitude | Altitude |
|--------------|----------|-----------|----------|
| Dublin       | 53.423°  | -6.238°   | 71 m     |
| Eindhoven    | 51.451°  | 5.377°    | 22.6 m   |
| Groningen    | 53.125°  | 6.585°    | 5.2 m    |
| Rotterdam    | 51.962°  | 4.447°    | -4.3 m   |
| Maastricht   | 50.906°  | 5.762°    | 114.3 m  |
| Twente       | 52.274°  | 6.891°    | 34.8 m   |

## 146 **5 Methods of Comparison and Model Evaluation**

147 Performances of the models were evaluated on the basis of mean percentage error (MPE), mean  
 148 bias error (MBE) and root mean square error (RMSE). MPE, MBE and RMSE are given in the  
 149 equation 15, 16 and 17.  $H_{i,m}$  is the  $i$ th measured value,  $H_{i,c}$  is the  $i$ th calculated value and  $N$  is the  
 150 total number of observations (Menges *et. al*, 2006). RMSE gives information about the short term  
 151 performance of the correlations by using a term-by-term comparison of the deviations between the  
 152 observed and calculated values. MBE presents the systematic error or bias and provides  
 153 information on the long-term performance, positive value of MBE shows an over-estimate and  
 154 negative value gives an under-estimate by the model. Values of MPE are calculated from the actual

155 differences between calculated and measured values, and give the percentage errors of the  
 156 correlation (Almorox, 2011). When MBE converges to zero, it is the ideal performance for the  
 157 model, while a low value of RMSE and low MPE are desirable (Iqbal, 1983).

$$158 \quad MPE = \frac{1}{N} \sum_{i=1}^n \left[ \frac{H_{i,c} - H_{i,m}}{H_{i,m}} \right] \cdot 100 \quad (15)$$

$$159 \quad MBE = \frac{\sum_{i=1}^n H_{i,c} - H_{i,m}}{N} \quad (16)$$

$$160 \quad RMSE = \sqrt{\left| \frac{\sum_{i=1}^n (H_{i,c} - H_{i,m})^2}{N} \right|} \quad (17)$$

161 The Nash-Sutcliffe equation is also an evaluation method. A model is more efficient when NSE is  
 162 closer to 1. The equation is shown in equation 18.  $\bar{H}_m$  is the mean measured global radiation  
 163 (Menges *et. al*, 2006).

$$164 \quad NSE = 1 - \frac{\sum_{i=1}^n (H_{i,m} - H_{i,c})^2}{\sum_{i=1}^n (H_{i,m} - \bar{H}_m)^2} \quad (18)$$

165 MBE and RMSE values explain the systematic errors of the models. When MBE value converges  
 166 to zero; the systematic error of the model decreases. It can be illustrated by bull's eye example. A  
 167 marksman wants to shot a bull from its eye. The bull's eye on the target represents the measured  
 168 solar radiation parameter we wish to estimate. If the marksman's aim is accurate, he/she scores a  
 169 bull's eye; on the other hand, the marksman misses the bull's eye by some distance. And the  
 170 marksman shoots the bull's eye repeatedly at the target, each time aiming at the bull's eye. The  
 171 distance between the point clusters that shot by the marksman and the center of the eye explains  
 172 the mean bias error (Biemer *et. al.*, 2003).

173 NSE is a method that indicates how well the plot of observed versus simulated data fits the line.

174 If NSE equals to 1, the model corresponds to a perfect match between modelled and observed data.



175 **6 Results and Discussions**

176 Solar radiation data can give useful information in the design and for studies about the solar energy  
 177 systems, agricultural processes, etc. In the literature, there are empirical models to estimate global  
 178 solar radiation. These models can be suitable tools if the parameters can be calibrated for the  
 179 different locations. In this study, some of the models in the literature were calibrated for Irish and  
 180 Dutch cities to estimate daily total global solar radiation. Also, five new models were presented in  
 181 this study and these models were validated with the meteorological data of Ireland and Holland.  
 182 Validation of the models were performed with MPE, MBE, RMSE and NSE methods and given  
 183 in the rest of the study.

184 *6.1 Hargreaves Model*

185 MPE, MBE, RMSE error analyze methods have been applied on the models. And, NSE value has  
 186 been calculated via Excel 2013. The values are shown in Table 2. Also, mean percentage errors  
 187 for the every month are given in Table 3.

188 In equation 5, Hargreaves model can be seen. *a* and *b* are the empirical coefficients. In this study,  
 189 these empirical coefficients to estimate daily total global solar radiation in Irish and Dutch cities  
 190 are found and given in Table 3. The coefficients were derived by using MATLAB R2015a and  
 191 Minitab Statistical Software.

192 **Table 2** Error analyses of the Hargreaves, Allen, Bristow-Campbell and Chen models

| Location |          | Monthly MPE |         |                  |         | Whole of the model |            |        |                  |        |
|----------|----------|-------------|---------|------------------|---------|--------------------|------------|--------|------------------|--------|
|          |          | Hargreaves  | Allen   | Bristow-Campbell | Chen    |                    | Hargreaves | Allen  | Bristow-Campbell | Chen   |
| Dublin   | January  | -38.061     | -38.507 | -37.256          | -36.680 | MBE                | 0.02       | -0,02  | 0.03             | 0.01   |
|          | February | -20.832     | -21.173 | -20.188          | -20.583 | RMSE               | 3.22       | 3,24   | 3.22             | 3.25   |
|          | March    | -14.052     | -13.993 | -13.768          | -12.998 | MPE                | -22.18     | -22,19 | -21.81           | -21.59 |
|          | April    | -11.314     | -11.070 | -11.149          | -9.803  | NSE                | 0.80       | 0,80   | 0.80             | 0.80   |
|          | May      | -8.364      | -8.075  | -8.306           | -8.268  |                    |            |        |                  |        |
|          | June     | -14.341     | -13.786 | -14.489          | -14.297 |                    |            |        |                  |        |
|          | July     | -17.631     | -17.252 | -17.660          | -18.558 |                    |            |        |                  |        |

|            |           |         |         |          |         |      |        |        |        |        |
|------------|-----------|---------|---------|----------|---------|------|--------|--------|--------|--------|
|            | August    | -15.353 | -15.013 | -15.368  | -16.293 |      |        |        |        |        |
|            | September | -12.452 | -12.390 | -12.175  | -11.417 |      |        |        |        |        |
|            | October   | -41.353 | -41.641 | -40.657  | -39.952 |      |        |        |        |        |
|            | November  | -31.560 | -32.044 | -30.748  | -30.568 |      |        |        |        |        |
|            | December  | -41.494 | -41.987 | -40.631  | -40.496 |      |        |        |        |        |
| Eindhoven  | January   | -23.704 | -36.444 | -17.552  | -21.837 | MBE  | 0.21   | -0.24  | 0.12   | 0.17   |
|            | February  | -21.700 | -30.261 | -16.621  | -20.914 | RMSE | 2.89   | 3.11   | 2.85   | 2.98   |
|            | March     | -12.285 | -13.986 | -10.278  | -14.049 | MPE  | -17.06 | -19.20 | -13.86 | -16.83 |
|            | April     | -8.681  | -3.287  | -7.904   | -8.623  | NSE  | 0.86   | 0.84   | 0.86   | 0.85   |
|            | May       | -14.863 | -12.722 | -13.163  | -14.085 |      |        |        |        |        |
|            | June      | -13.962 | -8.941  | -12.926  | -14.082 |      |        |        |        |        |
|            | July      | -12.756 | -10.254 | -12.312  | -13.721 |      |        |        |        |        |
|            | August    | -12.048 | -8.647  | -11.762  | -13.726 |      |        |        |        |        |
|            | September | -15.123 | -11.853 | -13.168  | -16.830 |      |        |        |        |        |
|            | October   | -14.361 | -16.067 | -10.953  | -15.798 |      |        |        |        |        |
|            | November  | -27.165 | -38.415 | -21.150  | -26.121 |      |        |        |        |        |
|            | December  | -25.968 | -40.400 | -19.429  | -23.303 |      |        |        |        |        |
| Groningen  | January   | -34.742 | -45.674 | -32.0205 | -32.959 | MBE  | 0.35   | -0.23  | 0.11   | 0.09   |
|            | February  | -18.449 | -25.194 | -16.228  | -18.642 | RMSE | 3.07   | 3.21   | 3.05   | 3.15   |
|            | March     | -13.620 | -14.749 | -12.427  | -13.912 | MPE  | -18.89 | -20.46 | -17.65 | -18.87 |
|            | April     | -8.559  | -4.751  | -8.362   | -8.518  | NSE  | 0.844  | 0.83   | 0.85   | 0.84   |
|            | May       | -14.581 | -11.963 | -14.272  | -13.705 |      |        |        |        |        |
|            | June      | -15.865 | -11.910 | -15.520  | -16.450 |      |        |        |        |        |
|            | July      | -11.197 | -8.204  | -10.861  | -11.113 |      |        |        |        |        |
|            | August    | -13.164 | -9.629  | -12.845  | -13.522 |      |        |        |        |        |
|            | September | -17.897 | -15.218 | -17.167  | -19.326 |      |        |        |        |        |
|            | October   | -25.430 | -27.360 | -23.721  | -27.241 |      |        |        |        |        |
|            | November  | -28.266 | -37.143 | -25.838  | -27.246 |      |        |        |        |        |
|            | December  | -25.459 | -34.041 | -23.074  | -24.593 |      |        |        |        |        |
| Maastricht | January   | -26.767 | -45.347 | -20.244  | -20.563 | MBE  | 0.22   | -0.38  | 0.24   | 0.37   |
|            | February  | -22.254 | -36.250 | -17.202  | -17.567 | RMSE | 2.94   | 3.29   | 2.91   | 3.05   |
|            | March     | -15.592 | -17.914 | -12.745  | -16.768 | MPE  | -20.46 | -24.22 | -17.65 | -20.01 |
|            | April     | -11.914 | -6.889  | -12.227  | -12.301 | NSE  | 0.86   | 0.82   | 0.86   | 0.85   |
|            | May       | -16.599 | -13.008 | -16.204  | -17.037 |      |        |        |        |        |
|            | June      | -17.894 | -11.612 | -17.867  | -20.378 |      |        |        |        |        |
|            | July      | -15.036 | -10.268 | -14.500  | -17.256 |      |        |        |        |        |
|            | August    | -13.171 | -7.599  | -13.061  | -15.340 |      |        |        |        |        |
|            | September | -14.800 | -11.910 | -13.336  | -18.403 |      |        |        |        |        |
|            | October   | -20.179 | -22.050 | -17.095  | -23.050 |      |        |        |        |        |
|            | November  | -27.354 | -42.285 | -21.225  | -23.829 |      |        |        |        |        |
|            | December  | -45.167 | -66.486 | -37.184  | -39.248 |      |        |        |        |        |
| Rotterdam  | January   | -32.303 | -41.692 | -23.510  | -30.659 | MBE  | -0.01  | -0.34  | 0.09   | -0.03  |
|            | February  | -29.201 | -35.084 | 23.125   | -29.140 | RMSE | 3.19   | 3.34   | 3.17   | 3.22   |
|            | March     | -13.401 | -13.571 | -11.610  | -14.228 | MPE  | -19.78 | -21.32 | -17.02 | -19.65 |
|            | April     | -7.483  | -3.626  | -8.831   | -7.401  | NSE  | 0.84   | 0.82   | 0.84   | 0.83   |
|            | May       | -13.943 | -12.121 | -13.676  | -13.046 |      |        |        |        |        |
|            | June      | -11.204 | -8.053  | -11.797  | -11.287 |      |        |        |        |        |
|            | July      | -10.658 | -8.785  | -10.555  | -10.569 |      |        |        |        |        |
|            | August    | -10.848 | -8.523  | -11.245  | -11.742 |      |        |        |        |        |
|            | September | -15.424 | -13.645 | -15.239  | -16.618 |      |        |        |        |        |
|            | October   | -25.473 | -27.340 | -22.519  | -26.414 |      |        |        |        |        |
|            | November  | -34.461 | -41.934 | -27.176  | -33.475 |      |        |        |        |        |
|            | December  | -34.136 | -42.664 | -26.169  | -32.638 |      |        |        |        |        |
| Twente     | January   | -25.681 | -37.525 | -37.525  | -23.901 | MBE  | 0.22   | -0.17  | -0.17  | 0.18   |
|            | February  | -22.185 | -29.122 | -29.122  | -23.060 | RMSE | 3.06   | 3.18   | 3.18   | 3.17   |
|            | March     | -12.945 | -14.001 | -14.001  | -13.966 | MPE  | -18.32 | -19.99 | -19.99 | -18.31 |
|            | April     | -10.124 | -5.542  | -5.543   | -10.164 | NSE  | 0.84   | 0.83   | 0.83   | 0.83   |
|            | May       | -18.467 | -14.504 | -14.505  | -18.233 |      |        |        |        |        |
|            | June      | -15.587 | -10.647 | -10.647  | -15.642 |      |        |        |        |        |
|            | July      | -14.841 | -11.175 | -11.175  | -14.539 |      |        |        |        |        |
|            | August    | -15.441 | -12.255 | -12.255  | -16.079 |      |        |        |        |        |

|           |         |         |         |         |
|-----------|---------|---------|---------|---------|
| September | -16.108 | -13.571 | -13.571 | -17.899 |
| October   | -18.629 | -20.498 | -20.498 | -20.544 |
| November  | -24.909 | -34.708 | -34.708 | -22.554 |
| December  | -25.613 | -37.001 | -37.000 | -23.844 |

193

**Table 3** Empirical coefficients for Hargreaves model

| <b>Location</b> | <b>“a” coefficient</b> | <b>“b” coefficient</b> |
|-----------------|------------------------|------------------------|
| Dublin          | 0.1472                 | -0.01362               |
| Eindhoven       | 0.1777                 | -0.1336                |
| Groningen       | 0.1716                 | -0.1004                |
| Maastricht      | 0.1983                 | -0.1739                |
| Rotterdam       | 0.1814                 | -0.1045                |
| Twente          | 0.1609                 | -0.09308               |

194

195 NSE values show good fit between calculated and measured values for Dutch cities, but for Dublin  
 196 it is worse. Maximum average MPE values of Hargreaves model is around 20 percent. It may be  
 197 acceptable, but in some months MPE values are higher than others; for instance winter months. In  
 198 Dutch cities the errors in April, in Dublin the error in May are more satisfactory.

## 199 6.2 Allen Model

200 Allen model was applied for the estimation of the daily solar global radiation in Irish and Dutch  
 201 cities. Empirical coefficient “a” was found by MS Office Excel 2013, coefficients can be seen in  
 202 Table 4. Error analyses of the Allen method’s application is seen in Table 2. NSE value is seen  
 203 usable in the table. But some of the monthly MPE values are higher than Hargreaves Model. In  
 204 November and December, there are higher deviations between the predicted and observed values.

205

**Table 4** Empirical coefficients for Allen model

| <b>Location</b> | <b>“a” coefficient</b> |
|-----------------|------------------------|
| Dublin          | 0.1418                 |
| Eindhoven       | 0.1291                 |
| Groningen       | 0.1335                 |
| Maastricht      | 0.1317                 |
| Rotterdam       | 0.1403                 |
| Twente          | 0.1266                 |

206

207 6.3 Bristow-Campbell Model

208 Bristow-Campbell model's equation can be seen in equation 8. "a", "b" and "c" are the empirical  
209 coefficients. They are shown in Table 5 for the estimation of the daily total global solar radiation  
210 in Ireland and Holland.

211 **Table 5** Empirical coefficients for Bristow-Campbell model

| <b>Location</b> | <b>"a" coefficient</b> | <b>"b" coefficient</b> | <b>"c" coefficient</b> |
|-----------------|------------------------|------------------------|------------------------|
| Dublin          | 1.991                  | 0.5956                 | 0.066                  |
| Eindhoven       | 1.260                  | 0.9157                 | 0.050                  |
| Groningen       | 1.644                  | 0.7726                 | 0.053                  |
| Maastricht      | 0.975                  | 1.0940                 | 0.051                  |
| Rotterdam       | 0.833                  | 1.0690                 | 0.075                  |
| Twente          | 2.523                  | 0.7001                 | 0.036                  |

212  
213 MBE, MPE, RMSE and NSE error analyses were applied to the model. These analyses and  
214 monthly MPE analyses can be seen in Table 2. NSE value can be assumed as acceptable. Some of  
215 the monthly MPE values do not give satisfaction for example in winter months. But for other  
216 months; it can be said, the deviations are not too high.

217 6.4 Chen Model

218 Chen model's empirical coefficients are seen in Table 6.

219 **Table 6** Empirical coefficients for Chen model

| <b>Location</b> | <b>"a" coefficient</b> | <b>"b" coefficient</b> |
|-----------------|------------------------|------------------------|
| Dublin          | 0.1841                 | 0.0269                 |
| Eindhoven       | 0.2337                 | -0.1014                |
| Groningen       | 0.2168                 | -0.0521                |
| Maastricht      | 0.2695                 | -0.1525                |
| Rotterdam       | 0.2244                 | -0.0464                |
| Twente          | 0.2083                 | -0.0539                |

220  
221 MBE, MPE, RMSE and NSE error analyses can be seen in Table 2. Also, the monthly MPE  
222 analysis is shown in table.

223 6.5 Ekici Models

224 Three daily solar radiation estimation models are suggested in this study. They were shown in  
 225 Equation 10, 11, 12 and 13. There are empirical coefficients in the models. The empirical  
 226 coefficients of the models can be seen in Table 7. These coefficients are calculated by regression  
 227 analyses of Minitab 17 Statistical Software and MATLAB fitting toolboxes. In the table, Equation  
 228 10 is called as Ekici’s Model 1, Equation 11 is Model 2 and Equation 12 and Equation 13 are  
 229 named as Model 3 and Model 4.

230 **Table 7** Empirical coefficients for Ekici models

| #                          | Location   | “a” coefficient       | “b” coefficient | “c” coefficient | “d” coefficient | “e” coefficient |
|----------------------------|------------|-----------------------|-----------------|-----------------|-----------------|-----------------|
| <i>Model 1</i><br>(Eq. 10) | Dublin     | -1.092                | -0.0333         | 0.009703        | 0.1331          | 1.007           |
|                            | Eindhoven  | -1.224                | -0.1198         | 0.01446         | 0.2098          | 1.091           |
|                            | Groningen  | -1.435                | -0.156          | 0.01554         | 0.2321          | 1.343           |
|                            | Maastricht | -1.433                | -0.2583         | 0.03107         | 0.2874          | 1.348           |
|                            | Rotterdam  | -1.472                | -0.2572         | 0.03116         | 0.2803          | 1.413           |
|                            | Twente     | -1.256                | -0.1483         | 0.02002         | 0.1801          | 1.216           |
| <i>Model 2</i><br>(Eq. 11) | Dublin     | -0.4202               | 0.09728         | -0.007322       |                 |                 |
|                            | Eindhoven  | -0.3242               | 0.1198          | -0.00599        |                 |                 |
|                            | Groningen  | -0.4326               | 0.0931          | -0.007682       |                 |                 |
|                            | Maastricht | -0.350                | 0.1138          | -0.00647        | -               | -               |
|                            | Rotterdam  | -0.4068               | 0.1047          | -0.007442       |                 |                 |
|                            | Twente     | -0.3921               | 0.09542         | -0.007086       |                 |                 |
| <i>Model 3</i><br>(Eq. 12) | Dublin     | -0.6164               | -0.02444        | -0.920          |                 |                 |
|                            | Eindhoven  | -0.5782               | -0.01691        | -0.9104         |                 |                 |
|                            | Groningen  | -0.6233               | -0.01365        | -0.9556         |                 |                 |
|                            | Maastricht | -0.5752               | 0.003312        | -0.9478         | -               | -               |
|                            | Rotterdam  | -0.6457               | -0.009491       | -1.026          |                 |                 |
|                            | Twente     | -0.5729               | -0.01314        | -0.9082         |                 |                 |
| <i>Model 4</i><br>(Eq. 13) | Dublin     | -0.1046               | 0.3166          | -0.21034        | 0.166           |                 |
|                            | Eindhoven  | 4.47•10 <sup>-6</sup> | -2.000          | 0.130           | 0.202           |                 |
|                            | Groningen  | 0.001094              | 1.210           | -0.2093         | 0.2899          |                 |
|                            | Maastricht | 0.210                 | 0.520           | -0.1923         | 0.5897          | -               |
|                            | Rotterdam  | 0.00081               | 1.256           | -0.2441         | 0.319           |                 |
|                            | Twente     | 0.006525              | 0.9105          | -0.2017         | 0.2839          |                 |

231 RMSE, MBE, MPE and NSE error analyses were executed to the application of the models that  
 232 are suggested in the study to estimate solar radiation of Irish and Dutch cities. The error values can  
 233 be seen in the Table 8. Error values can be seen as acceptable, monthly MPE values are also seen  
 234 as acceptable. For Dublin, in January, December and October, the monthly MPE values are higher

235 than the others. For Dutch cities, in May, the monthly values are seen higher than other months.  
 236 The correlation between the observed and the measured values (NSE) for all cities are seen  
 237 acceptable.

238 **Table 8** Error analyses of Ekici models

| Locat<br>ion |           | Monthly MPE |            |            |            |      | Whole of the model |            |            |            |
|--------------|-----------|-------------|------------|------------|------------|------|--------------------|------------|------------|------------|
|              |           | Model<br>1  | Model<br>2 | Model<br>3 | Model<br>4 |      | Model<br>1         | Model<br>2 | Model<br>3 | Model<br>4 |
| Dublin       | January   | -25.235     | -24.388    | -18.213    | -13.394    | MBE  | 0.12               | 0.14       | -0.26      | -0.20      |
|              | February  | -10.202     | -10.384    | -11.488    | -4.729     | RMSE | 2.87               | 2.88       | 3.04       | 2.85       |
|              | March     | -11.597     | -11.098    | -10.927    | -6.530     | MPE  | -15.61             | -15.60     | -12.17     | -10.57     |
|              | April     | -11.708     | -11.104    | -11.396    | -9.094     | NSE  | 0.84               | 0.84       | 0.82       | 0.84       |
|              | May       | -10.182     | -10.663    | -10.092    | -7.244     |      |                    |            |            |            |
|              | June      | -15.929     | -16.458    | -10.480    | -13.134    |      |                    |            |            |            |
|              | July      | -15.513     | -16.528    | -8.728     | -12.087    |      |                    |            |            |            |
|              | August    | -13.247     | -13.997    | -8.500     | -10.298    |      |                    |            |            |            |
|              | September | -5.481      | -5.320     | -2.284     | -3.650     |      |                    |            |            |            |
|              | October   | -26.453     | -26.050    | -19.642    | -21.148    |      |                    |            |            |            |
|              | November  | -17.868     | -17.478    | -14.118    | -10.018    |      |                    |            |            |            |
|              | December  | -23.569     | -23.641    | -19.324    | -15.885    |      |                    |            |            |            |
| Eindhoven    | January   | -8.835      | -9.163     | -6.242     | -0.433     | MBE  | 0.21               | 0.23       | 0.12       | -0.27      |
|              | February  | -13.657     | -12.540    | -15.225    | -3.400     | RMSE | 2.50               | 2.52       | 2.67       | 2.56       |
|              | March     | -12.550     | -11.735    | -19.983    | -5.134     | MPE  | -9.94              | -10.20     | -9.74      | -4.23      |
|              | April     | -11.340     | -11.690    | -14.066    | -6.359     | NSE  | 0.89               | 0.89       | 0.88       | 0.89       |
|              | May       | -15.829     | -16.826    | -17.411    | -9.980     |      |                    |            |            |            |
|              | June      | -14.657     | -15.341    | -12.688    | -8.924     |      |                    |            |            |            |
|              | July      | -11.137     | -12.053    | -10.107    | -7.627     |      |                    |            |            |            |
|              | August    | -7.655      | -7.965     | -5.326     | -4.727     |      |                    |            |            |            |
|              | September | -4.628      | -4.582     | 0.683      | -1.414     |      |                    |            |            |            |
|              | October   | -1.345      | -1.563     | 2.193      | 3.127      |      |                    |            |            |            |
|              | November  | -9.766      | -10.257    | -10.474    | -4.589     |      |                    |            |            |            |
|              | December  | -6.660      | -7.570     | -5.699     | -0.796     |      |                    |            |            |            |
| Groningen    | January   | -15.920     | -17.355    | -19.812    | -11.472    | MBE  | 0.19               | 0.22       | 0.15       | -0.18      |
|              | February  | -8.471      | -9.072     | -14.571    | -3.804     | RMSE | 2.69               | 2.72       | 2.83       | 2.74       |
|              | March     | -12.085     | -11.751    | -19.692    | -8.338     | MPE  | -11.41             | -12.06     | -12.69     | -7.95      |
|              | April     | -10.680     | -11.224    | -13.434    | -7.985     | NSE  | 0.88               | 0.88       | 0.87       | 0.88       |
|              | May       | -18.449     | -19.006    | -18.554    | -12.480    |      |                    |            |            |            |
|              | June      | -19.135     | -19.683    | -16.147    | -13.248    |      |                    |            |            |            |
|              | July      | -10.085     | -10.637    | -8.251     | -7.276     |      |                    |            |            |            |
|              | August    | -7.770      | -8.009     | -4.920     | -6.443     |      |                    |            |            |            |
|              | September | -8.914      | -8.849     | -4.650     | -6.274     |      |                    |            |            |            |
|              | October   | -9.194      | -10.796    | -9.728     | -8.948     |      |                    |            |            |            |
|              | November  | -6.440      | -8.270     | -11.528    | -6.733     |      |                    |            |            |            |
|              | December  | -8.368      | -8.743     | -8.266     | -1.505     |      |                    |            |            |            |
| Maastricht   | January   | -11.981     | -13.557    | -6.351     | -3.049     | MBE  | 0.20               | 0.26       | 0.17       | -0.38      |
|              | February  | -12.894     | -13.262    | -13.523    | -5.014     | RMSE | 2.56               | 2.60       | 2.89       | 2.65       |
|              | March     | -15.778     | -16.126    | -22.315    | -9.260     | MPE  | -12.49             | -13.71     | -12.37     | -6.44      |
|              | April     | -13.430     | -14.107    | -16.024    | -8.168     | NSE  | 0.89               | 0.89       | 0.86       | 0.88       |
|              | May       | -15.524     | -17.091    | -18.371    | -10.377    |      |                    |            |            |            |
|              | June      | -15.283     | -16.430    | -15.796    | -9.899     |      |                    |            |            |            |

|           |           |         |         |         |         |      |        |        |        |        |
|-----------|-----------|---------|---------|---------|---------|------|--------|--------|--------|--------|
|           | July      | -11.854 | -13.351 | -13.047 | -6.925  |      |        |        |        |        |
|           | August    | -9.867  | -10.356 | -12.796 | -5.931  |      |        |        |        |        |
|           | September | -5.210  | -5.871  | -4.380  | -0.843  |      |        |        |        |        |
|           | October   | -6.255  | -7.507  | -2.746  | -0.367  |      |        |        |        |        |
|           | November  | -11.456 | -12.673 | -8.681  | -3.417  |      |        |        |        |        |
|           | December  | -19.431 | -23.383 | -12.587 | -13.317 |      |        |        |        |        |
| Rotterdam | January   | -12.753 | -14.002 | -19.495 | -12.373 | MBE  | -0.10  | 0.14   | 0.15   | 0.12   |
|           | February  | -13.132 | -14.693 | -16.008 | -11.746 | RMSE | 2.80   | 2.83   | 3.03   | 2.87   |
|           | March     | -9.348  | -10.602 | -11.886 | -7.111  | MPE  | -10.45 | -12.47 | -13.89 | -11.65 |
|           | April     | -5.673  | -7.933  | -8.921  | -8.512  | NSE  | 0.87   | 0.87   | 0.85   | 0.87   |
|           | May       | -12.697 | -15.982 | -18.672 | -16.642 |      |        |        |        |        |
|           | June      | -11.266 | -13.943 | -13.896 | -12.566 |      |        |        |        |        |
|           | July      | -10.053 | -12.864 | -15.893 | -13.827 |      |        |        |        |        |
|           | August    | -7.876  | -10.825 | -10.229 | -11.122 |      |        |        |        |        |
|           | September | -6.429  | -8.056  | -6.183  | -8.472  |      |        |        |        |        |
|           | October   | -8.100  | -10.846 | -9.107  | -10.975 |      |        |        |        |        |
|           | November  | -11.574 | -13.213 | -15.741 | -13.437 |      |        |        |        |        |
|           | December  | -16.452 | -16.651 | -19.986 | -13.202 |      |        |        |        |        |
| Twente    | January   | -10.432 | -8.949  | -10.447 | -2.942  | MBE  | 0.21   | 0.20   | 0.12   | 0.10   |
|           | February  | -10.972 | -10.570 | -13.437 | -5.158  | RMSE | 2.55   | 2.56   | 2.62   | 2.56   |
|           | March     | -11.132 | -10.558 | -17.593 | -8.649  | MPE  | -9.99  | -9.76  | -10.21 | -7.58  |
|           | April     | -12.212 | -12.455 | -14.283 | -12.194 | NSE  | 0.89   | 0.89   | 0.89   | 0.89   |
|           | May       | -19.080 | -19.676 | -18.206 | -17.750 |      |        |        |        |        |
|           | June      | -15.377 | -15.624 | -12.137 | -13.460 |      |        |        |        |        |
|           | July      | -11.850 | -12.117 | -9.708  | -11.698 |      |        |        |        |        |
|           | August    | -7.437  | -7.942  | -5.319  | -8.728  |      |        |        |        |        |
|           | September | -2.294  | -2.481  | 1.179   | -2.307  |      |        |        |        |        |
|           | October   | 0.475   | -0.861  | 3.326   | 0.883   |      |        |        |        |        |
|           | November  | -7.174  | -5.421  | -12.309 | -4.469  |      |        |        |        |        |
|           | December  | -10.611 | -8.737  | -11.010 | -3.257  |      |        |        |        |        |

239 A graphic showing the differences between the measured and calculated solar radiation values of  
240 the models on daily basis for the month of February 2008 was drawn for Eindhoven. This graphic  
241 is given in Figure 1; it may be give idea about the models' daily trends. If you look at the daily  
242 trends of the models in the literature, it is seen that these models have more scattered errors. But  
243 in developed models, it can be said that the errors are a little bit more closer to each other on daily  
244 basis. Since it can be said that all models show the similar tendency in general.

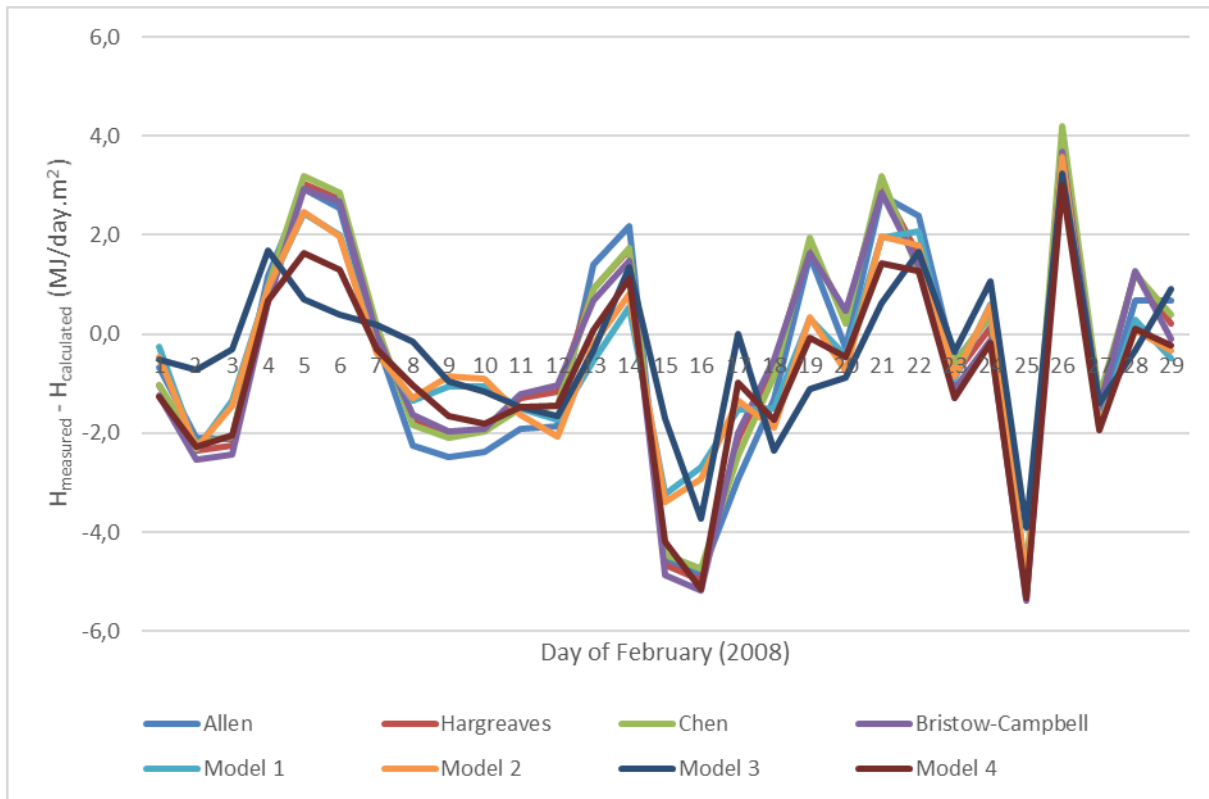

245

246 **Figure 1** Differences between measured and calculated daily total global solar radiation values in February 2008  
 247 (Eindhoven)

248 Weather conditions for February 2008 in Eindhoven is given in Figure 2. Some comments can  
 249 be given by looking at this figure. It can be said; in the days when the difference between  $\Delta T$  and  
 250 daily average air temperature is lower, the errors in the models are more than the other days. It  
 251 can be said that for Model 3, while the differences between the maximum and minimum relative  
 252 humidity values are higher, the results are better than the other models.



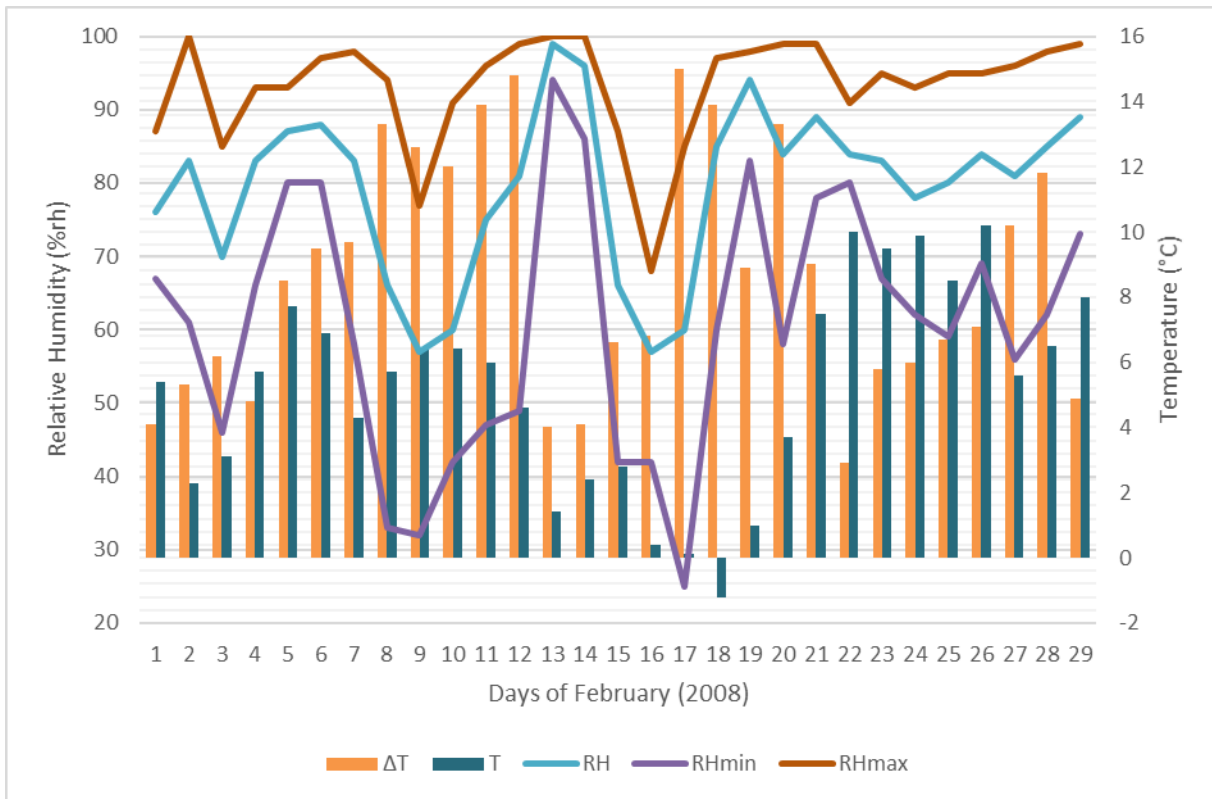

Figure 2 Measured weather data in February 2008 (Eindhoven)

253

254

255

256 MPE values of Allen model, Hargreaves model, Chen model and Bristow-Campbell model are  
 257 seen closer to each other, lay between -15 % ~ -20 %. The best value (-13.86 %) is seen in  
 258 Eindhoven's Bristow-Campbell model, the worst value (-24.22 %) is seen in Allen Model for  
 259 Maastricht. Ekici models give better performance in MPE analyses. Model 4 performs best in MPE  
 260 analyses. The best performance is seen in Eindhoven for Model 4. It is thought, the main reason  
 261 of that situation is caused by using more parameters than other Ekici models. Saturation vapor  
 262 pressure is an extra parameter in Model 4 to describe solar radiation, which related to average air  
 263 temperature.

264 In monthly MPE analyses, Allen model has got higher errors than other models. Bristow-Campbell  
 265 model shows better monthly MPE performance than Chen model and Hargreaves model. In winter  
 266 months, models do not fit the measured values as well. It is thought; cloudy days affect to the

267 model performance in prediction of solar radiation with low accuracy. Monthly performances of  
268 Ekici models are better than the models in literature. Best monthly MPE results are seen in Model  
269 4.

## 270 **6 Conclusions**

271 Empirical models are usable tools to estimate global solar radiation, if the radiation parameters are  
272 not available in the station. Main aim of this study is estimation of the daily total solar global  
273 radiation values by using maximum and minimum daily air temperatures and daily average and  
274 extreme relative humidity values. The daily data were taken from meteorological agencies of  
275 Ireland and Holland. These data are daily total global solar radiation, daily average relative  
276 humidity values, daily relative humidity extremes, daily minimum air temperatures and daily  
277 maximum air temperatures. Data were selected between 2008 and 2016's first half. It is thought;  
278 the recent measurements are more accurate and traceable.

279 Hargreaves, Allen, Bristow-Campbell and Chen models were applied to the cities for the prediction  
280 of the daily total global solar radiation.

281 In MPE analyses of this study, all of Ekici models show better performances than other models  
282 those exist in the literature.

283 Hargreaves and Allen models have got good agreement in mean bias errors for Dutch and Irish  
284 cities, but for Dublin the value of MBE is seen better than other cities' values. The situation of  
285 Dublin about MBE values for Bristow-Campbell and Chen models are seem similar as Hargreaves  
286 and Allen models. Allen Model's MBE values are greater than other three models' MBE values.  
287 Ekici models' MBE values are closer to the MBE values of other models. The greatest value of  
288 MBE in Ekici models is seen in Maastricht for Model 4. RMSE values of all models are seen closer  
289 to each other, but in Ekici models RMSE values are a little bit better than others. It can be said;

290 the systematic errors of the models are similar, Ekici models' values are a little bit lesser than  
291 others.

292 Nash-Sutcliffe error analyses were applied to the all models. All of the models' NSE values are  
293 greater than 0.80. Ekici models in Eindhoven, Maastricht and Twente show best fits in the study  
294 and have got the greatest NSE values.

295 In this study, four new models that are based on the relative humidity, relative humidity extremes  
296 and the difference between maximum and minimum air temperatures were suggested. Model 1  
297 and 3 gives good score in mean bias error. But all of the Ekici models' MBE and RMSE values  
298 are closer to each other. NSE values are all of the Ekici models are similar. So it can be said; all  
299 of the Ekici models show good agreement between calculated and measured values. All of the four  
300 models give better scores in error analyses than the other models that exist in the literature for the  
301 estimation of the Irish and Dutch cities' daily total solar global radiation.

### 302 **Conflict of interest**

303 The author declares that there is no conflict of interest regarding the publication of this article.

### 304 ***References***

- 305 - Allen, R., (1997). "Self-calibrating method for estimating solar radiation from air temperature",  
306 Journal of Hydrologic Engineering, 2(2): 56-67.
- 307 - Almorox, J. (2011). Estimating global solar radiation from common meteorological data in  
308 Aranjuez, Spain. Turkish journal of physics, 35(1), 53-64.
- 309 - Armstrong, S., & Hurley, W. G. (2010). A new methodology to optimise solar energy extraction  
310 under cloudy conditions. Renewable Energy, 35(4), 780-787.
- 311 - Biemer, P. P., & Lyberg, L. E. (2003). Introduction to survey quality (Vol. 335). John Wiley &  
312 Sons.

- 313 - Bristow, K. L., & Campbell, G. S. (1984). On the relationship between incoming solar radiation  
314 and daily maximum and minimum temperature. *Agricultural and forest meteorology*, 31(2), 159-  
315 166.
- 316 - Campbell, G.S., Norman, J.M. (1998). “An introduction to environmental biophysics”, Springer  
317 Science & Business Media.
- 318 - Chen, R., Ersi, K., Yang, J., Lu, S., & Zhao, W. (2004). Validation of five global radiation  
319 models with measured daily data in China. *Energy Conversion and Management*, 45(11), 1759-  
320 1769.
- 321 - Hargreaves, G. L., Hargreaves, G. H., & Riley, J. P. (1985). Irrigation water requirements for  
322 Senegal River basin. *Journal of Irrigation and Drainage Engineering*, 111(3), 265-275.
- 323 - Iqbal M. (1983). *An Introduction to Solar Radiation*. Academic Press, Toronto.
- 324 - Menges, H. O., Ertekin, C., & Sonmete, M. H. (2006). Evaluation of global solar radiation  
325 models for Konya, Turkey. *Energy Conversion and Management*, 47(18), 3149-3173.
- 326 - Meza, F., & Varas, E. (2000). Estimation of mean monthly solar global radiation as a function of  
327 temperature. *Agricultural and Forest Meteorology*, 100(2), 231-241.
- 328
